# Supplementary material for: Synergistic effects in mixtures of two identically charged ionic surfactants with different critical micelle concentrations
Source: Royal Society of Chemistry journal article supplement (doi:10.1039/c1sm06064c), 2011-01-01
Supplement: c1sm06064c.pdf [file c1sm06064c.pdf]

## Supplementary information

Concentration of free DDAB ( $c_1^{free}$ ), free DTAB ( $c_2^{free}$ ), surfactant present in aggregates ( $c_{agg}$ ) and mole fraction of DDAB in aggregates as calculated from the Poisson-Boltzmann theory and the activity coefficients in eqns (19) and (20) at different overall surfactant concentrations ( $c_t$ ) for a given value  $y$  of the mole fraction of DDAB in solution. The corresponding tables for other  $y$ -values may be found in the supporting information.

| $y$   | $c_t$ /mM | $x$    | $c_{agg}$ /mM | $c_1^{free}$ /mM | $c_2^{free}$ /mM    |          |
|-------|-----------|--------|---------------|------------------|---------------------|----------|
| 0.350 | 200.00    | 0.3720 | 188.19        | 11.805           | $7.8 \cdot 10^{-4}$ | Micelles |
| 0.350 | 160.00    | 0.3777 | 148.26        | 11.743           | $8.0 \cdot 10^{-4}$ | Micelles |
| 0.350 | 120.00    | 0.3876 | 108.36        | 11.636           | $8.2 \cdot 10^{-4}$ | Micelles |
| 0.350 | 100.00    | 0.3957 | 88.451        | 11.548           | $8.5 \cdot 10^{-4}$ | Micelles |
| 0.350 | 80.00     | 0.4082 | 68.588        | 11.411           | $8.8 \cdot 10^{-4}$ | Micelles |
| 0.350 | 60.00     | 0.4338 | 48.412        | 11.588           | $2.7 \cdot 10^{-4}$ | Bilayers |

| $y$   | $c_t$ /mM | $x$    | $c_{agg}$ /mM | $c_1^{free}$ /mM | $c_2^{free}$ /mM    |          |
|-------|-----------|--------|---------------|------------------|---------------------|----------|
| 0.300 | 120.00    | 0.3340 | 107.79        | 12.208           | $6.8 \cdot 10^{-4}$ | Micelles |
| 0.300 | 60.00     | 0.3734 | 48.210        | 11.790           | $7.9 \cdot 10^{-4}$ | Micelles |
| 0.300 | 40.00     | 0.4238 | 28.310        | 11.690           | $2.6 \cdot 10^{-4}$ | Bilayers |
| 0.300 | 30.00     | 0.4771 | 18.864        | 11.136           | $3.1 \cdot 10^{-4}$ | Bilayers |
| 0.300 | 20.00     | 0.5910 | 10.151        | 9.8486           | $4.3 \cdot 10^{-4}$ | Bilayers |
| 0.300 | 15.00     | 0.6941 | 6.4822        | 8.5172           | $5.9 \cdot 10^{-4}$ | Bilayers |
| 0.300 | 10.00     | 0.8284 | 3.6201        | 6.3789           | $9.4 \cdot 10^{-4}$ | Bilayers |
| 0.300 | 7.50      | 0.8951 | 2.5123        | 4.9864           | $1.3 \cdot 10^{-3}$ | Bilayers |
| 0.300 | 5.00      | 0.9506 | 1.5768        | 3.4222           | $2.0 \cdot 10^{-3}$ | Bilayers |
| 0.300 | 2.50      | 0.9872 | 0.7556        | 1.7403           | $4.1 \cdot 10^{-3}$ | Bilayers |

| $y$   | $c_t$ /mM | $x$    | $c_{agg}$ /mM | $c_1^{free}$ /mM | $c_2^{free}$ /mM    |          |
|-------|-----------|--------|---------------|------------------|---------------------|----------|
| 0.250 | 120.00    | 0.2798 | 107.23        | 12.766           | $5.5 \cdot 10^{-4}$ | Micelles |
| 0.250 | 60.00     | 0.3151 | 47.595        | 12.405           | $6.4 \cdot 10^{-4}$ | Micelles |
| 0.250 | 40.00     | 0.3567 | 28.031        | 11.968           | $7.4 \cdot 10^{-4}$ | Micelles |
| 0.250 | 30.00     | 0.4122 | 18.193        | 11.807           | $2.5 \cdot 10^{-4}$ | Bilayers |
| 0.250 | 20.00     | 0.5297 | 9.4387        | 10.561           | $3.6 \cdot 10^{-4}$ | Bilayers |
| 0.250 | 15.00     | 0.6445 | 5.8177        | 9.1818           | $5.1 \cdot 10^{-4}$ | Bilayers |
| 0.250 | 10.00     | 0.8005 | 3.1220        | 6.8772           | $8.4 \cdot 10^{-4}$ | Bilayers |
| 0.250 | 7.50      | 0.8785 | 2.1326        | 5.3663           | $1.2 \cdot 10^{-3}$ | Bilayers |
| 0.250 | 5.00      | 0.9430 | 1.3237        | 3.6745           | $1.9 \cdot 10^{-3}$ | Bilayers |
| 0.250 | 2.50      | 0.9853 | 0.6305        | 1.8657           | $3.8 \cdot 10^{-3}$ | Bilayers |

| $y$   | $c_t/\text{mM}$ | $x$    | $c_{agg}/\text{mM}$ | $c_1^{free}/\text{mM}$ | $c_2^{free}/\text{mM}$ |          |
|-------|-----------------|--------|---------------------|------------------------|------------------------|----------|
| 0.200 | 120.00          | 0.2250 | 106.69              | 13.313                 | $4.3 \cdot 10^{-4}$    | Micelles |
| 0.200 | 60.00           | 0.2554 | 46.988              | 13.012                 | $5.0 \cdot 10^{-4}$    | Micelles |
| 0.200 | 40.00           | 0.2924 | 27.362              | 12.638                 | $5.8 \cdot 10^{-4}$    | Micelles |
| 0.200 | 30.00           | 0.3367 | 17.820              | 12.180                 | $6.9 \cdot 10^{-4}$    | Micelles |
| 0.200 | 20.00           | 0.4604 | 8.6874              | 11.312                 | $2.9 \cdot 10^{-4}$    | Bilayers |
| 0.200 | 15.00           | 0.5873 | 5.1066              | 9.8930                 | $4.3 \cdot 10^{-4}$    | Bilayers |
| 0.200 | 10.00           | 0.7691 | 2.5996              | 7.3996                 | $7.5 \cdot 10^{-4}$    | Bilayers |
| 0.200 | 7.50            | 0.8602 | 1.7425              | 5.7565                 | $1.1 \cdot 10^{-3}$    | Bilayers |
| 0.200 | 5.00            | 0.9348 | 1.0681              | 3.9302                 | $1.7 \cdot 10^{-3}$    | Bilayers |
| 0.200 | 2.50            | 0.9832 | 0.5049              | 1.9915                 | $3.6 \cdot 10^{-3}$    | Bilayers |

| $y$   | $c_t/\text{mM}$ | $x$    | $c_{agg}/\text{mM}$ | $c_1^{free}/\text{mM}$ | $c_2^{free}/\text{mM}$ |          |
|-------|-----------------|--------|---------------------|------------------------|------------------------|----------|
| 0.150 | 120.00          | 0.1696 | 106.15              | 13.848                 | $3.2 \cdot 10^{-4}$    | Micelles |
| 0.150 | 60.00           | 0.1940 | 46.385              | 13.614                 | $3.7 \cdot 10^{-4}$    | Micelles |
| 0.150 | 40.00           | 0.2248 | 26.685              | 13.314                 | $4.3 \cdot 10^{-4}$    | Micelles |
| 0.150 | 30.00           | 0.2636 | 17.070              | 12.929                 | $5.2 \cdot 10^{-4}$    | Micelles |
| 0.150 | 20.00           | 0.3680 | 8.1516              | 11.848                 | $7.7 \cdot 10^{-4}$    | Micelles |
| 0.150 | 15.00           | 0.5198 | 4.3282              | 10.672                 | $3.5 \cdot 10^{-4}$    | Bilayers |
| 0.150 | 10.00           | 0.7232 | 2.0452              | 7.9542                 | $6.7 \cdot 10^{-4}$    | Bilayers |
| 0.150 | 7.50            | 0.8399 | 1.3385              | 6.1605                 | $9.8 \cdot 10^{-4}$    | Bilayers |
| 0.150 | 5.00            | 0.9259 | 0.8083              | 4.1902                 | $1.6 \cdot 10^{-3}$    | Bilayers |
| 0.150 | 2.50            | 0.9811 | 0.3789              | 2.1177                 | $3.3 \cdot 10^{-3}$    | Bilayers |

| $y$   | $c_t/\text{mM}$ | $x$    | $c_{agg}/\text{mM}$ | $c_1^{free}/\text{mM}$ | $c_2^{free}/\text{mM}$ |          |
|-------|-----------------|--------|---------------------|------------------------|------------------------|----------|
| 0.100 | 120.00          | 0.1136 | 105.63              | 14.375                 | $2.1 \cdot 10^{-4}$    | Micelles |
| 0.100 | 60.00           | 0.1310 | 45.787              | 14.213                 | $2.4 \cdot 10^{-4}$    | Micelles |
| 0.100 | 40.00           | 0.1538 | 26.002              | 13.998                 | $2.8 \cdot 10^{-4}$    | Micelles |
| 0.100 | 30.00           | 0.1841 | 16.290              | 13.710                 | $3.5 \cdot 10^{-4}$    | Micelles |
| 0.100 | 20.00           | 0.2773 | 7.2081              | 12.791                 | $5.5 \cdot 10^{-4}$    | Micelles |
| 0.100 | 15.00           | 0.4362 | 3.4365              | 11.563                 | $2.7 \cdot 10^{-4}$    | Bilayers |
| 0.100 | 10.00           | 0.6915 | 1.4454              | 8.5540                 | $5.8 \cdot 10^{-4}$    | Bilayers |
| 0.100 | 7.50            | 0.8173 | 0.9162              | 6.5829                 | $9.0 \cdot 10^{-4}$    | Bilayers |
| 0.100 | 5.00            | 0.9163 | 0.5439              | 4.4546                 | $1.5 \cdot 10^{-3}$    | Bilayers |
| 0.100 | 2.50            | 0.9787 | 0.2522              | 2.2447                 | $3.1 \cdot 10^{-3}$    | Bilayers |

| $y$   | $c_t/\text{mM}$ | $x$    | $c_{agg}/\text{mM}$ | $c_1^{free}/\text{mM}$ | $c_2^{free}/\text{mM}$ |          |
|-------|-----------------|--------|---------------------|------------------------|------------------------|----------|
| 0.050 | 120.00          | 0.0571 | 105.11              | 14.891                 | $1.0 \cdot 10^{-4}$    | Micelles |
| 0.050 | 60.00           | 0.0664 | 45.193              | 14.807                 | $1.2 \cdot 10^{-4}$    | Micelles |
| 0.050 | 40.00           | 0.0790 | 25.307              | 14.693                 | $1.4 \cdot 10^{-4}$    | Micelles |
| 0.050 | 30.00           | 0.0970 | 15.472              | 14.528                 | $1.7 \cdot 10^{-4}$    | Micelles |
| 0.050 | 20.00           | 0.1639 | 6.0972              | 13.903                 | $3.0 \cdot 10^{-4}$    | Micelles |
| 0.050 | 15.00           | 0.3031 | 2.4710              | 12.528                 | $6.1 \cdot 10^{-4}$    | Micelles |
| 0.050 | 10.00           | 0.6415 | 0.7790              | 9.2205                 | $5.0 \cdot 10^{-4}$    | Bilayers |
| 0.050 | 7.50            | 0.7918 | 0.4727              | 7.0264                 | $8.1 \cdot 10^{-4}$    | Bilayers |
| 0.050 | 5.00            | 0.9059 | 0.2742              | 4.7244                 | $1.4 \cdot 10^{-3}$    | Bilayers |
| 0.050 | 2.50            | 0.9762 | 0.1250              | 2.3721                 | $3.0 \cdot 10^{-3}$    | Bilayers |
